# Supplementary material for: A Preliminary Study for Reference RF Coil at 11.7 T MRI: Based on Electromagnetic Field Simulation of Hybrid-BC RF Coil According to Diameter and Length at 3.0, 7.0 and 11.7 T
Source: MDPI journal article supplement (doi:10.3390/s22041512), 2022-02-15
Supplement: s1 [file s1]

# Supplementary Materials

Un-normalized case

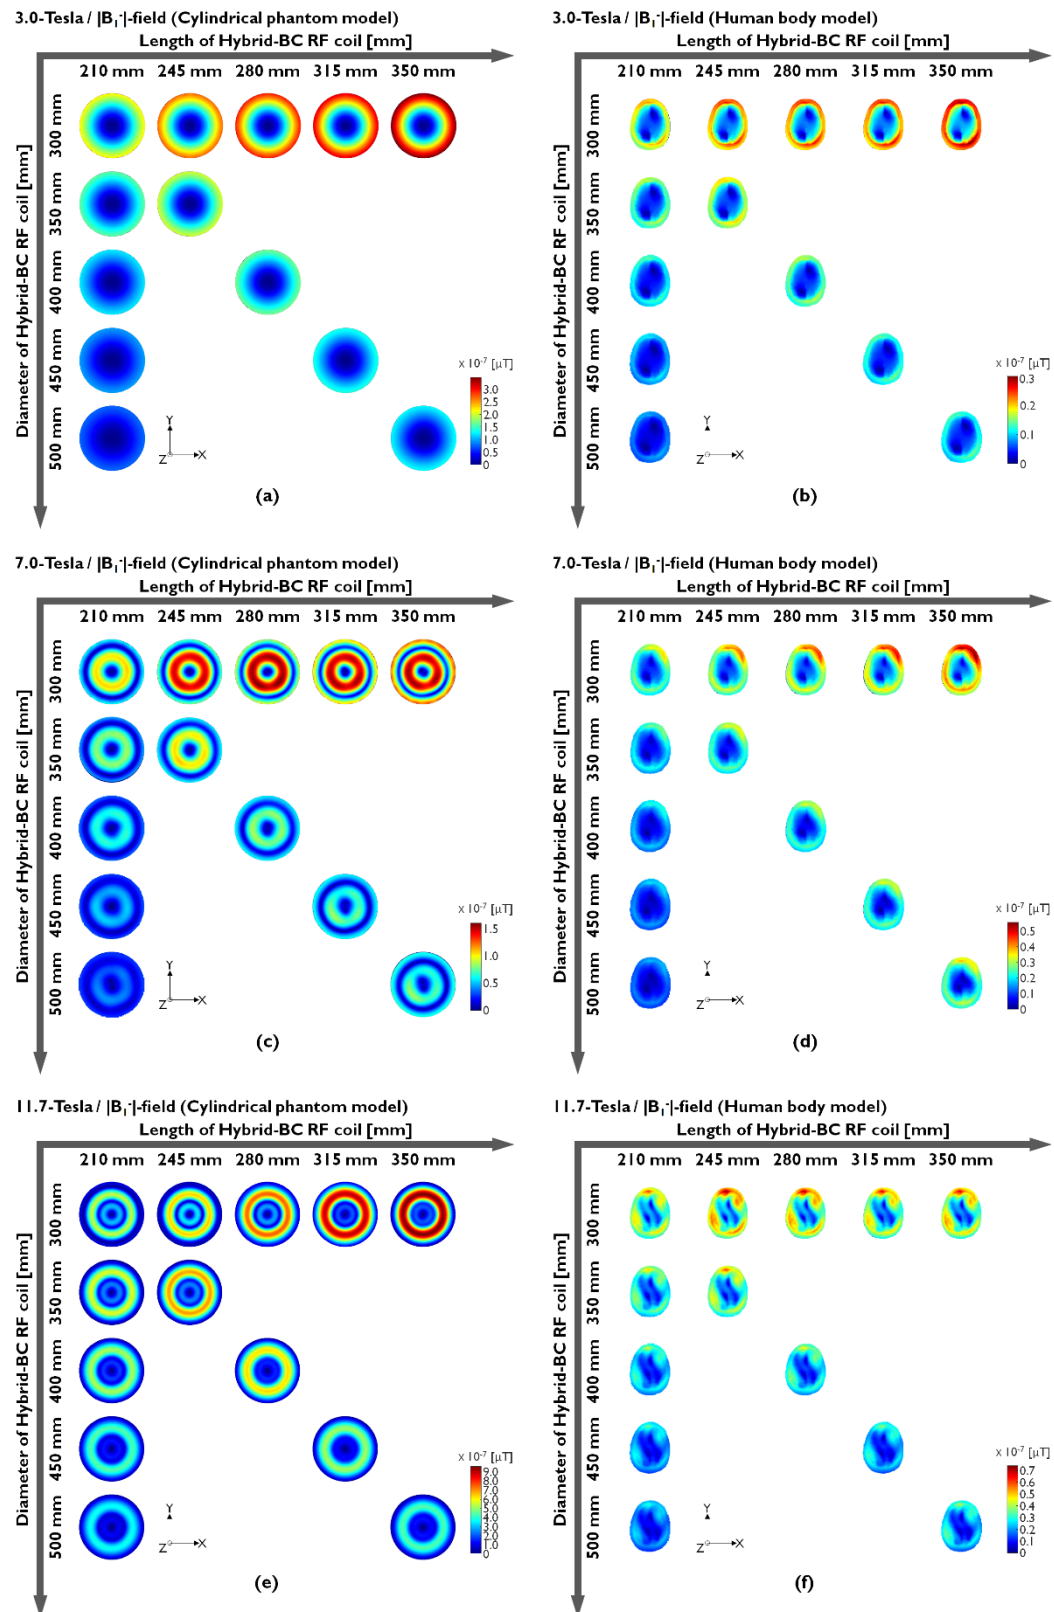

**Figure S1.** Unnormalized  $|B_1|$ -field distribution obtained when using a cylindrical phantom model (a, c, and e) or a human body model (b, d, and f).

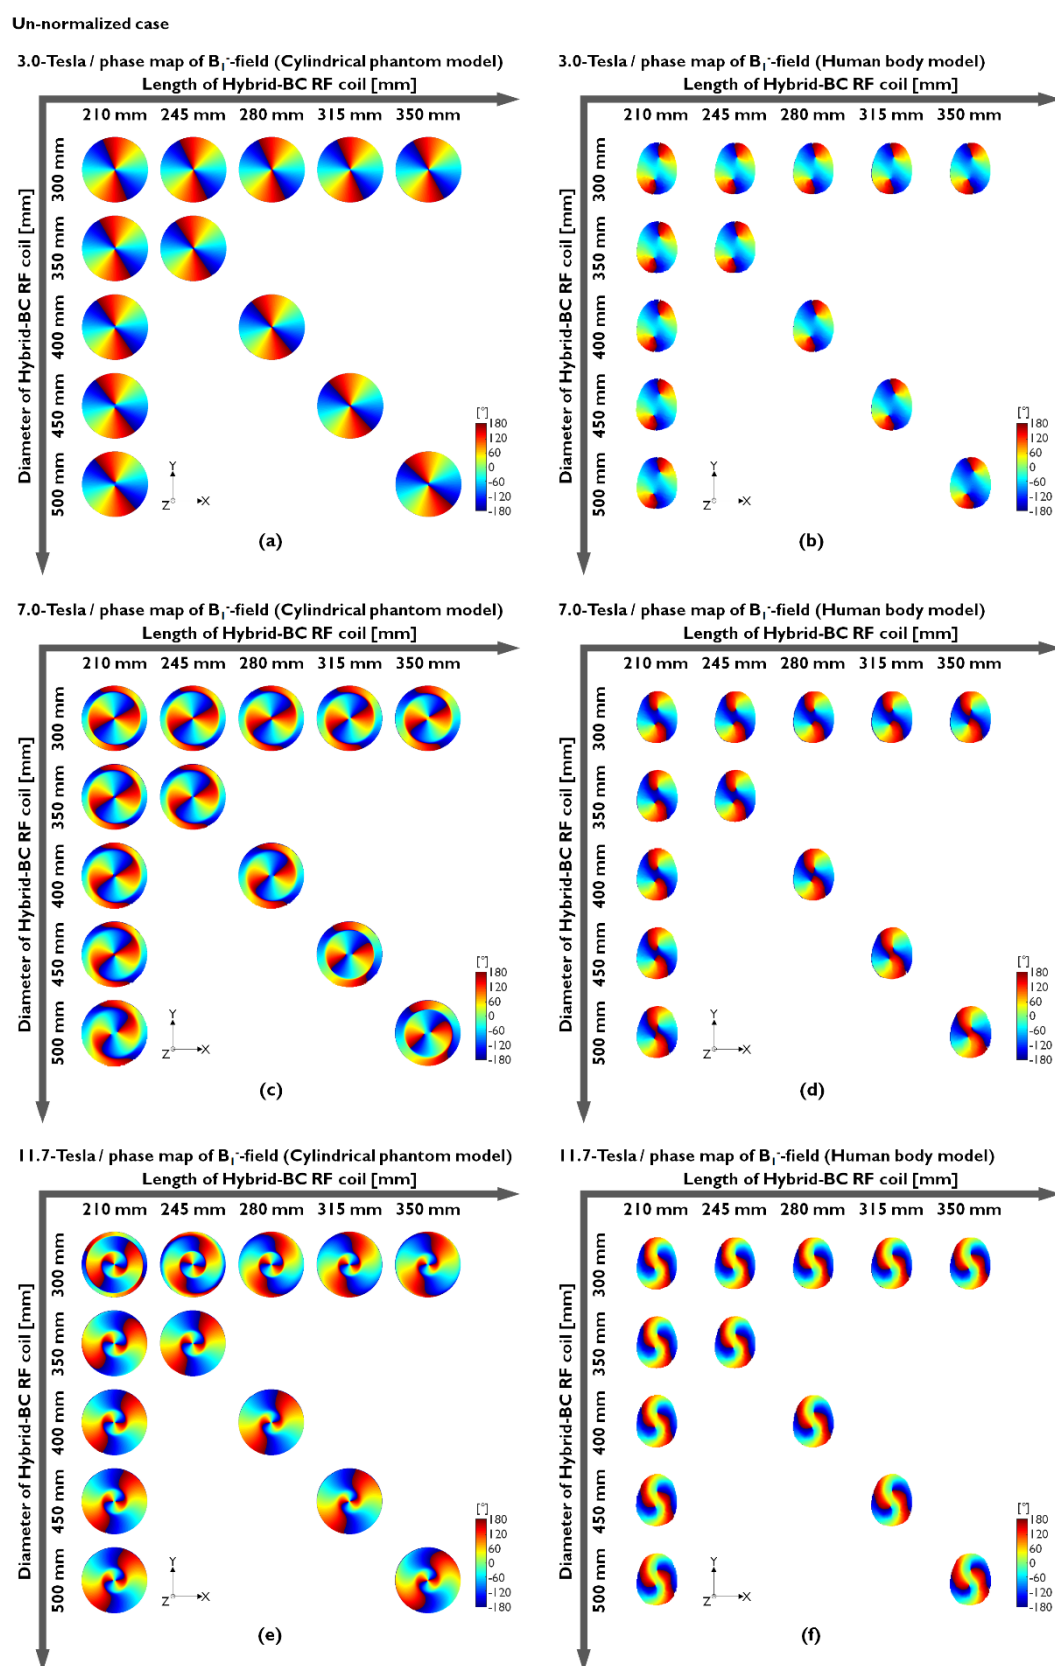

**Figure S2.** Phase map of the unnormalized  $B_1^-$ -field distribution obtained when using a cylindrical phantom model (a, c, and e) or a human body model (b, d, and f).

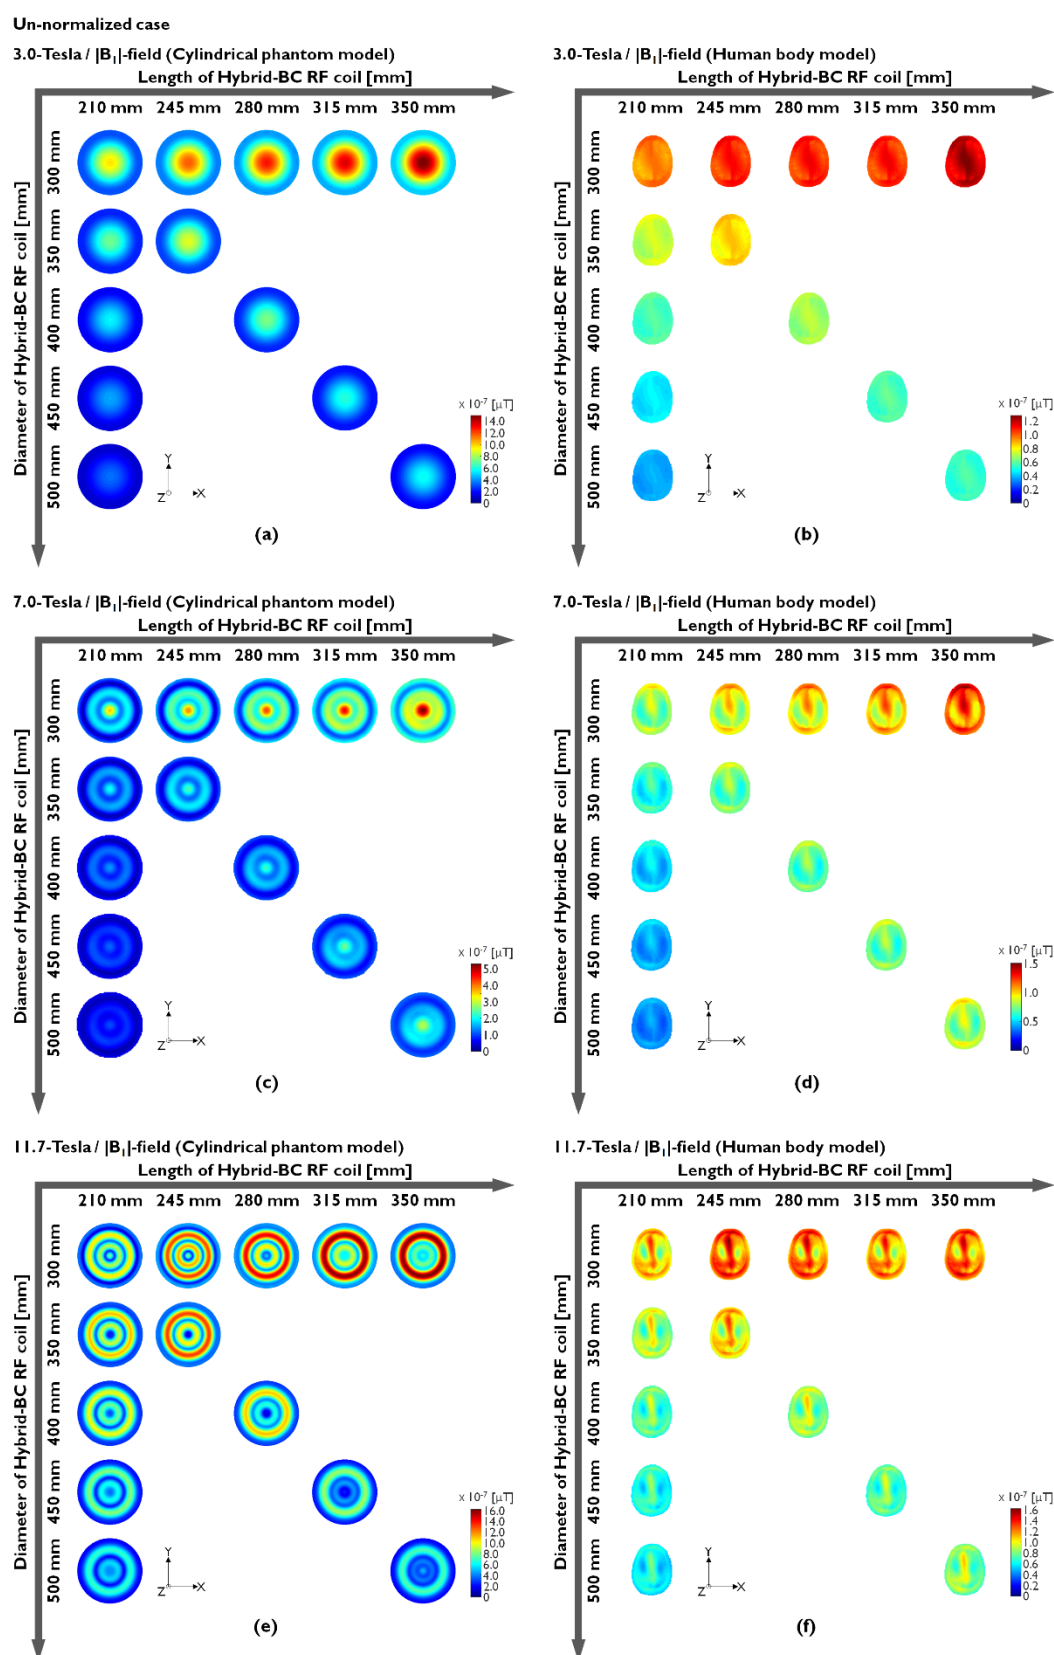

**Figure S3.** Unnormalized  $|B_1|$ -field distribution obtained when using a cylindrical phantom model (a, c, and e) or a human body model (b, d, and f).

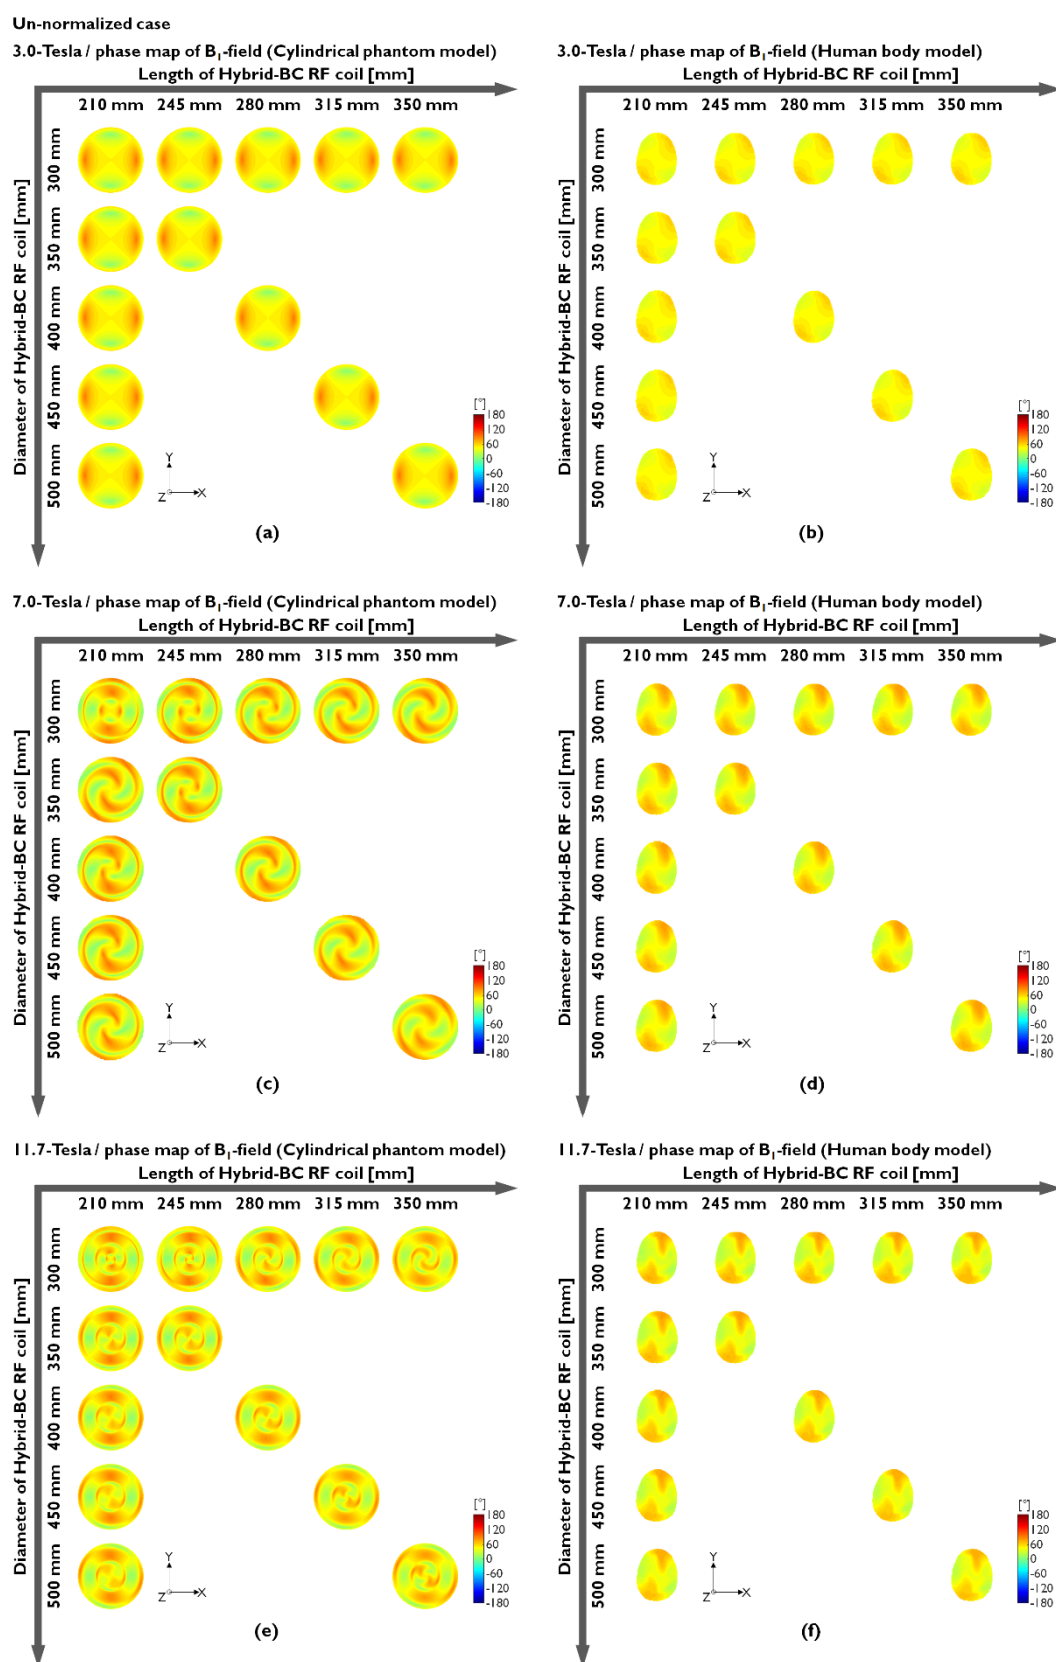

**Figure S4.** Phase map of the unnormalized  $B_1$ -field distribution obtained when using a cylindrical phantom model (a, c, and e) or a human body model (b, d, and f).

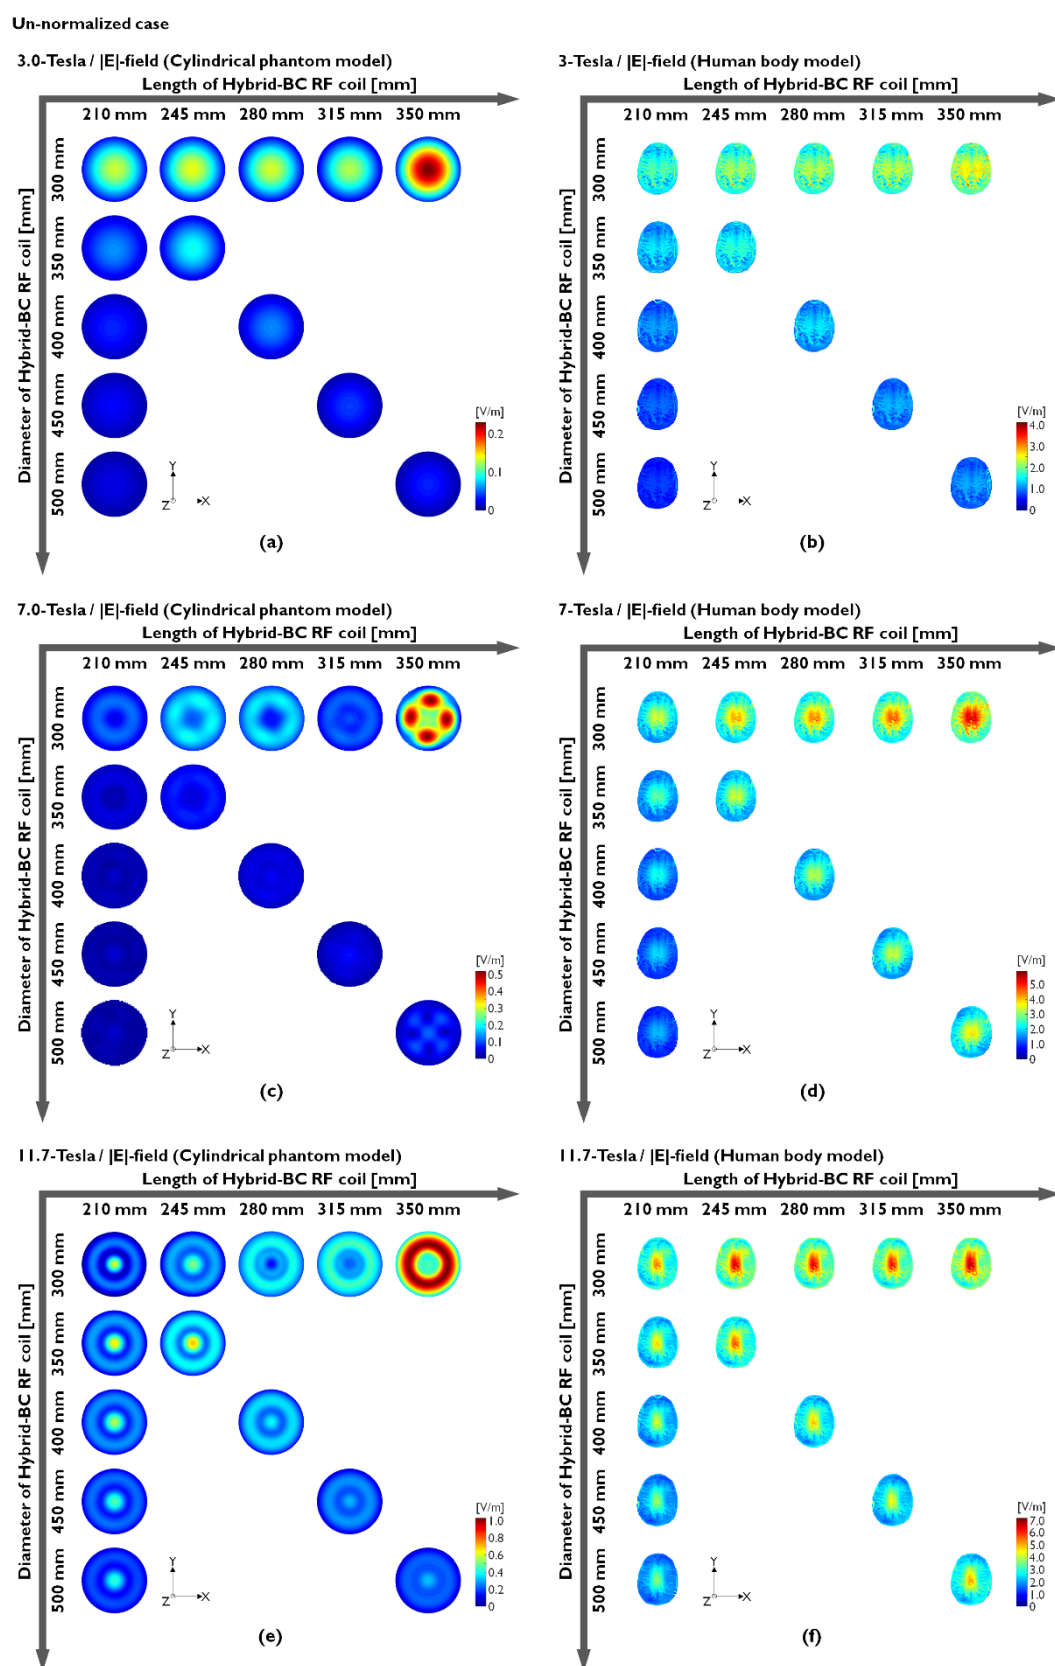

**Figure S5.** Unnormalized  $|E|$ -field distribution obtained when using a cylindrical phantom model (a, c, and e) or a human body model (b, d, and f).

**Table S1.** Unnormalized  $|B_1^-|$ -field values obtained when using a cylindrical phantom model or a human body model at a 3.0, 7.0, or 11.7 T MRI system.

| Cylindrical phantom model (Distilled water) |        |                                        |       |       |       |       |                                         |       |       |       |       |
|---------------------------------------------|--------|----------------------------------------|-------|-------|-------|-------|-----------------------------------------|-------|-------|-------|-------|
| D (mm)                                      | L (mm) | Max values [ $\times 10^{-6}$ $\mu$ T] |       |       |       |       | Mean values [ $\times 10^{-6}$ $\mu$ T] |       |       |       |       |
|                                             |        | 210                                    | 245   | 280   | 315   | 350   | 210                                     | 245   | 280   | 315   | 350   |
| 3.0 T                                       | 300    | 0.217                                  | 0.268 | 0.295 | 0.313 | 0.347 | 0.134                                   | 0.165 | 0.181 | 0.193 | 0.214 |
|                                             | 350    | 0.160                                  | 0.200 |       |       |       | 0.100                                   | 0.124 |       |       |       |
|                                             | 400    | 0.121                                  |       | 0.166 |       |       | 0.076                                   |       | 0.103 |       |       |
|                                             | 450    | 0.095                                  |       |       | 0.139 |       | 0.059                                   |       |       | 0.086 |       |
|                                             | 500    | 0.076                                  |       |       |       | 0.130 | 0.047                                   |       |       |       | 0.080 |
| 7.0 T                                       | 300    | 0.106                                  | 0.148 | 0.160 | 0.154 | 0.155 | 0.055                                   | 0.076 | 0.084 | 0.085 | 0.090 |
|                                             | 350    | 0.084                                  | 0.108 |       |       |       | 0.043                                   | 0.056 |       |       |       |
|                                             | 400    | 0.067                                  |       | 0.085 |       |       | 0.035                                   |       | 0.047 |       |       |
|                                             | 450    | 0.052                                  |       |       | 0.083 |       | 0.028                                   |       |       | 0.043 |       |
|                                             | 500    | 0.042                                  |       |       |       | 0.083 | 0.024                                   |       |       |       | 0.044 |
| 11.7 T                                      | 300    | 0.540                                  | 0.645 | 0.749 | 0.901 | 0.969 | 0.236                                   | 0.286 | 0.372 | 0.467 | 0.472 |
|                                             | 350    | 0.571                                  | 0.693 |       |       |       | 0.284                                   | 0.350 |       |       |       |
|                                             | 400    | 0.519                                  |       | 0.629 |       |       | 0.273                                   |       | 0.334 |       |       |
|                                             | 450    | 0.439                                  |       |       | 0.512 |       | 0.234                                   |       |       | 0.274 |       |
|                                             | 500    | 0.377                                  |       |       |       | 0.436 | 0.201                                   |       |       |       | 0.229 |
| Human body model (Duke phantom)             |        |                                        |       |       |       |       |                                         |       |       |       |       |
| D (mm)                                      | L (mm) | Max values [ $\times 10^{-6}$ $\mu$ T] |       |       |       |       | Mean values [ $\times 10^{-6}$ $\mu$ T] |       |       |       |       |
|                                             |        | 210                                    | 245   | 280   | 315   | 350   | 210                                     | 245   | 280   | 315   | 350   |
| 3.0 T                                       | 300    | 0.020                                  | 0.023 | 0.024 | 0.024 | 0.027 | 0.011                                   | 0.013 | 0.013 | 0.013 | 0.015 |
|                                             | 350    | 0.015                                  | 0.018 |       |       |       | 0.008                                   | 0.010 |       |       |       |
|                                             | 400    | 0.013                                  |       | 0.015 |       |       | 0.007                                   |       | 0.008 |       |       |
|                                             | 450    | 0.010                                  |       |       | 0.013 |       | 0.005                                   |       |       | 0.007 |       |
|                                             | 500    | 0.008                                  |       |       |       | 0.013 | 0.004                                   |       |       |       | 0.007 |
| 7.0 T                                       | 300    | 0.037                                  | 0.044 | 0.047 | 0.050 | 0.056 | 0.019                                   | 0.023 | 0.024 | 0.026 | 0.029 |
|                                             | 350    | 0.028                                  | 0.034 |       |       |       | 0.015                                   | 0.018 |       |       |       |
|                                             | 400    | 0.024                                  |       | 0.034 |       |       | 0.012                                   |       | 0.018 |       |       |
|                                             | 450    | 0.020                                  |       |       | 0.035 |       | 0.010                                   |       |       | 0.018 |       |
|                                             | 500    | 0.018                                  |       |       |       | 0.039 | 0.009                                   |       |       |       | 0.020 |
| 11.7 T                                      | 300    | 0.061                                  | 0.074 | 0.072 | 0.067 | 0.069 | 0.032                                   | 0.038 | 0.036 | 0.033 | 0.034 |
|                                             | 350    | 0.050                                  | 0.059 |       |       |       | 0.026                                   | 0.030 |       |       |       |
|                                             | 400    | 0.043                                  |       | 0.047 |       |       | 0.021                                   |       | 0.024 |       |       |
|                                             | 450    | 0.036                                  |       |       | 0.039 |       | 0.018                                   |       |       | 0.020 |       |
|                                             | 500    | 0.031                                  |       |       |       | 0.041 | 0.016                                   |       |       |       | 0.021 |

**Table S2.** Unnormalized  $|B_1|$ -field values obtained when using a cylindrical phantom model or a human body model at a 3.0, 7.0, or 11.7 T MRI system.

| Cylindrical phantom model (Distilled water) |        |                                                 |       |       |       |       |                                         |       |       |       |       |
|---------------------------------------------|--------|-------------------------------------------------|-------|-------|-------|-------|-----------------------------------------|-------|-------|-------|-------|
| D (mm)                                      | L (mm) | Center-point values [ $\times 10^{-6}$ $\mu$ T] |       |       |       |       | Mean values [ $\times 10^{-6}$ $\mu$ T] |       |       |       |       |
|                                             |        | 210                                             | 245   | 280   | 315   | 350   | 210                                     | 245   | 280   | 315   | 350   |
| 3.0 T                                       | 300    | 0.963                                           | 1.169 | 1.277 | 1.352 | 1.500 | 0.478                                   | 0.590 | 0.652 | 0.694 | 0.775 |
|                                             | 350    | 0.717                                           | 0.884 |       |       |       | 0.357                                   | 0.445 |       |       |       |
|                                             | 400    | 0.543                                           |       | 0.733 |       |       | 0.271                                   |       | 0.373 |       |       |
|                                             | 450    | 0.423                                           |       |       | 0.607 |       | 0.212                                   |       |       | 0.310 |       |
|                                             | 500    | 0.338                                           |       |       |       | 0.565 | 0.170                                   |       |       |       | 0.290 |
| 7.0 T                                       | 300    | 0.351                                           | 0.386 | 0.423 | 0.463 | 0.528 | 0.123                                   | 0.156 | 0.182 | 0.203 | 0.234 |
|                                             | 350    | 0.200                                           | 0.236 |       |       |       | 0.091                                   | 0.115 |       |       |       |
|                                             | 400    | 0.141                                           |       | 0.224 |       |       | 0.074                                   |       | 0.109 |       |       |
|                                             | 450    | 0.115                                           |       |       | 0.250 |       | 0.063                                   |       |       | 0.117 |       |
|                                             | 500    | 0.101                                           |       |       |       | 0.291 | 0.055                                   |       |       |       | 0.134 |
| 11.7 T                                      | 300    | 0.779                                           | 0.787 | 0.505 | 0.598 | 0.657 | 0.545                                   | 0.691 | 0.769 | 0.871 | 0.845 |
|                                             | 350    | 0.247                                           | 0.176 |       |       |       | 0.605                                   | 0.722 |       |       |       |
|                                             | 400    | 0.308                                           |       | 0.144 |       |       | 0.554                                   |       | 0.606 |       |       |
|                                             | 450    | 0.367                                           |       |       | 0.233 |       | 0.464                                   |       |       | 0.472 |       |
|                                             | 500    | 0.414                                           |       |       |       | 0.479 | 0.396                                   |       |       |       | 0.403 |
| Human body model (Duke phantom)             |        |                                                 |       |       |       |       |                                         |       |       |       |       |
| D (mm)                                      | L (mm) | Center-point values [ $\times 10^{-6}$ $\mu$ T] |       |       |       |       | Mean values [ $\times 10^{-6}$ $\mu$ T] |       |       |       |       |
|                                             |        | 210                                             | 245   | 280   | 315   | 350   | 210                                     | 245   | 280   | 315   | 350   |
| 3.0 T                                       | 300    | 0.101                                           | 0.116 | 0.117 | 0.118 | 0.132 | 0.099                                   | 0.111 | 0.111 | 0.110 | 0.123 |
|                                             | 350    | 0.077                                           | 0.090 |       |       |       | 0.075                                   | 0.087 |       |       |       |
|                                             | 400    | 0.061                                           |       | 0.074 |       |       | 0.059                                   |       | 0.071 |       |       |
|                                             | 450    | 0.048                                           |       |       | 0.063 |       | 0.047                                   |       |       | 0.059 |       |
|                                             | 500    | 0.039                                           |       |       |       | 0.060 | 0.038                                   |       |       |       | 0.056 |
| 7.0 T                                       | 300    | 0.086                                           | 0.100 | 0.107 | 0.114 | 0.132 | 0.078                                   | 0.089 | 0.095 | 0.101 | 0.116 |
|                                             | 350    | 0.067                                           | 0.081 |       |       |       | 0.060                                   | 0.072 |       |       |       |
|                                             | 400    | 0.055                                           |       | 0.078 |       |       | 0.050                                   |       | 0.070 |       |       |
|                                             | 450    | 0.047                                           |       |       | 0.081 |       | 0.043                                   |       |       | 0.072 |       |
|                                             | 500    | 0.043                                           |       |       |       | 0.089 | 0.038                                   |       |       |       | 0.080 |
| 11.7 T                                      | 300    | 0.114                                           | 0.133 | 0.127 | 0.118 | 0.127 | 0.111                                   | 0.131 | 0.127 | 0.119 | 0.128 |
|                                             | 350    | 0.100                                           | 0.116 |       |       |       | 0.092                                   | 0.108 |       |       |       |
|                                             | 400    | 0.088                                           |       | 0.099 |       |       | 0.078                                   |       | 0.089 |       |       |
|                                             | 450    | 0.080                                           |       |       | 0.089 |       | 0.069                                   |       |       | 0.078 |       |
|                                             | 500    | 0.414                                           |       |       |       | 0.479 | 0.396                                   |       |       |       | 0.407 |

**Table S3.** Unnormalized  $|E|$ -field values obtained when using a cylindrical phantom model or a human body model at a 3.0, 7.0, or 11.7 T MRI system.

| Cylindrical phantom model (Distilled water) |        |                                        |       |       |       |       |                                         |       |       |       |       |
|---------------------------------------------|--------|----------------------------------------|-------|-------|-------|-------|-----------------------------------------|-------|-------|-------|-------|
| D (mm)                                      | L (mm) | Max values [ $\times 10^{-6}$ $\mu$ T] |       |       |       |       | Mean values [ $\times 10^{-6}$ $\mu$ T] |       |       |       |       |
|                                             |        | 210                                    | 245   | 280   | 315   | 350   | 210                                     | 245   | 280   | 315   | 350   |
| 3.0 T                                       | 300    | 0.130                                  | 0.138 | 0.133 | 0.125 | 0.230 | 0.072                                   | 0.074 | 0.071 | 0.065 | 0.118 |
|                                             | 350    | 0.060                                  | 0.088 |       |       |       | 0.036                                   | 0.049 |       |       |       |
|                                             | 400    | 0.034                                  |       | 0.058 |       |       | 0.022                                   |       | 0.032 |       |       |
|                                             | 450    | 0.027                                  |       |       | 0.040 |       | 0.016                                   |       |       | 0.022 |       |
|                                             | 500    | 0.022                                  |       |       |       | 0.034 | 0.013                                   |       |       |       | 0.018 |
| 7.0 T                                       | 300    | 0.119                                  | 0.201 | 0.194 | 0.118 | 0.519 | 0.084                                   | 0.146 | 0.139 | 0.089 | 0.271 |
|                                             | 350    | 0.047                                  | 0.050 |       |       |       | 0.034                                   | 0.060 |       |       |       |
|                                             | 400    | 0.037                                  |       | 0.058 |       |       | 0.021                                   |       | 0.040 |       |       |
|                                             | 450    | 0.038                                  |       |       | 0.066 |       | 0.017                                   |       |       | 0.032 |       |
|                                             | 500    | 0.034                                  |       |       |       | 0.114 | 0.016                                   |       |       |       | 0.056 |
| 11.7 T                                      | 300    | 0.600                                  | 0.515 | 0.412 | 0.461 | 1.030 | 0.159                                   | 0.236 | 0.313 | 0.345 | 0.718 |
|                                             | 350    | 0.657                                  | 0.702 |       |       |       | 0.227                                   | 0.310 |       |       |       |
|                                             | 400    | 0.559                                  |       | 0.382 |       |       | 0.224                                   |       | 0.271 |       |       |
|                                             | 450    | 0.470                                  |       |       | 0.309 |       | 0.194                                   |       |       | 0.208 |       |
|                                             | 500    | 0.428                                  |       |       |       | 0.322 | 0.168                                   |       |       |       | 0.183 |
| Human body model (Duke phantom)             |        |                                        |       |       |       |       |                                         |       |       |       |       |
| D (mm)                                      | L (mm) | Max values [ $\times 10^{-6}$ $\mu$ T] |       |       |       |       | Mean values [ $\times 10^{-6}$ $\mu$ T] |       |       |       |       |
|                                             |        | 210                                    | 245   | 280   | 315   | 350   | 210                                     | 245   | 280   | 315   | 350   |
| 3.0 T                                       | 300    | 3.067                                  | 3.556 | 3.634 | 3.653 | 4.094 | 1.556                                   | 1.814 | 1.857 | 1.875 | 2.111 |
|                                             | 350    | 3.295                                  | 3.993 |       |       |       | 1.203                                   | 1.421 |       |       |       |
|                                             | 400    | 2.696                                  |       | 2.600 |       |       | 0.947                                   |       | 1.179 |       |       |
|                                             | 450    | 1.766                                  |       |       | 2.258 |       | 0.762                                   |       |       | 0.999 |       |
|                                             | 500    | 1.520                                  |       |       |       | 2.195 | 0.623                                   |       |       |       | 0.959 |
| 7.0 T                                       | 300    | 3.793                                  | 4.568 | 4.821 | 5.074 | 5.867 | 2.184                                   | 2.610 | 2.756 | 2.906 | 3.352 |
|                                             | 350    | 3.458                                  | 4.256 |       |       |       | 1.745                                   | 2.155 |       |       |       |
|                                             | 400    | 3.234                                  |       | 3.593 |       |       | 1.457                                   |       | 2.085 |       |       |
|                                             | 450    | 2.188                                  |       |       | 3.679 |       | 1.261                                   |       |       | 2.129 |       |
|                                             | 500    | 1.945                                  |       |       |       | 4.253 | 1.131                                   |       |       |       | 2.353 |
| 11.7 T                                      | 300    | 5.718                                  | 6.856 | 6.739 | 6.498 | 7.146 | 3.078                                   | 3.719 | 3.655 | 3.519 | 3.889 |
|                                             | 350    | 5.001                                  | 5.953 |       |       |       | 2.643                                   | 3.175 |       |       |       |
|                                             | 400    | 4.447                                  |       | 5.787 |       |       | 2.322                                   |       | 2.727 |       |       |
|                                             | 450    | 4.047                                  |       |       | 4.710 |       | 2.113                                   |       |       | 2.486 |       |
|                                             | 500    | 4.135                                  |       |       |       | 5.380 | 2.020                                   |       |       |       | 2.870 |
